# Supplementary material
Source: PubMed Central journal article supplement (PMC2789614)

# Supp Figure S1

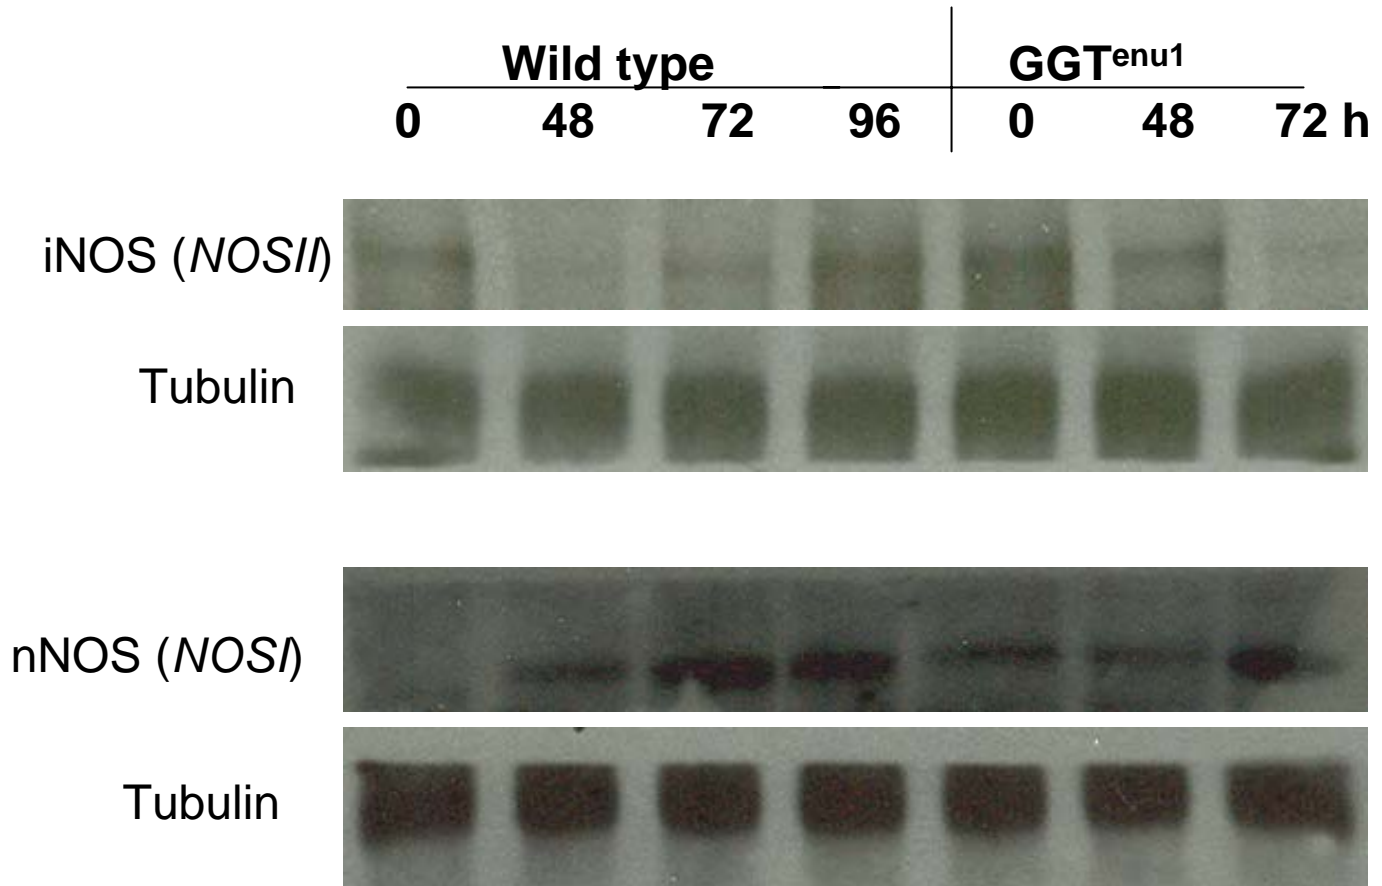

Supplement: ajpath.2009.081017_1.pdf [file ajpath.2009.081017_1.pdf]
